# Supplementary material for: Impact of Zr top electrode on tantalum oxide-based electrochemical metallization resistive switching memory: towards synaptic functionalities
Source: Royal Society of Chemistry journal article supplement (doi:10.1039/d2ra02456j), 2022-01-01
Supplement: d2ra02456j1.pdf [file d2ra02456j1.pdf]

## Supporting Information

### **Impact of Zr Top Electrode on Tantalum Oxide-based Electrochemical Metallization Resistive Switching Memory (ReRAM): Towards Synaptic Functionalities**

*Niloufar Raeis-Hosseini<sup>1\*</sup>, Chen Shauchuan<sup>2</sup>, Christos Papavassiliou<sup>1</sup>, and Ilia Valov<sup>2,3</sup>*

*<sup>1</sup> Department of Electronics and Electrical Engineering, Imperial College London, London, SW7 2BT, United Kingdom.*

*<sup>2</sup> Peter Gruenberg Institute, Research Centre Juelich, Juelich 52425, Germany.*

*<sup>3</sup> Institute for Materials in Electrical Engineering II, RWTH Aachen University, Sommerfeldstrasse 24, Aachen 52074, Germany.*

\* Corresponding author: [n.raeishosseini@imperial.ac.uk](mailto:n.raeishosseini@imperial.ac.uk)

| Reference    | On/Off Ratio | Current Level (mA) | Voltage (V) | Bipolar Polarity | Cyclic Voltammetry Measurement | Retention & Endurance | XPS data available | Top Electrode Material | ECM-based ReRAM | Tantalum Oxide form                                | The structure of the memory device                        |
|--------------|--------------|--------------------|-------------|------------------|--------------------------------|-----------------------|--------------------|------------------------|-----------------|----------------------------------------------------|-----------------------------------------------------------|
| <sup>1</sup> | No           | 1.5                | -1.5, 1     | Yes              | No                             | No                    | No                 | Ta                     | No              | TaO <sub>x</sub> (Ta <sub>2</sub> O <sub>5</sub> ) | Pt/Ta/Ta <sub>2</sub> O <sub>5</sub> /Pt                  |
| <sup>2</sup> | No           | 60                 | -3, 2       | Yes              | No                             | No                    | No                 | Ta                     | No              | TaO <sub>x</sub> (Ta <sub>2</sub> O <sub>5</sub> ) | Ta/(TaO <sub>2</sub> )Ta <sub>2</sub> O <sub>5</sub> /Pt  |
| <sup>3</sup> | Yes          | 2                  | -2, 2       | Yes              | No                             | Yes                   | No                 | Pd                     | No              | Ta <sub>2</sub> O <sub>5-x</sub> /TaO <sub>y</sub> | Pd/Ta <sub>2</sub> O <sub>5-x</sub> /TaO <sub>y</sub> /Pd |
| <sup>4</sup> | Yes          | 1                  | -1, 2       | Yes              | No                             | Yes                   | Yes                | Pt                     | No              | Ta <sub>2</sub> O <sub>5-x</sub>                   | Pt/ Ta <sub>2</sub> O <sub>5-x</sub> /Ta                  |
| <sup>5</sup> | No           | 3                  | -1.5, 1.5   | Yes              | No                             | Yes                   | Yes                | Ti                     | No              | Ta <sub>2</sub> O <sub>3-x</sub>                   | Ti/Ta <sub>2</sub> O <sub>3-x</sub> /Pt                   |
| <sup>6</sup> | No           | ×                  | ×           | ×                | No                             | No                    | No                 | Ta                     | No              | Ta <sub>2</sub> O <sub>5</sub>                     | Ta/Ta <sub>2</sub> O <sub>5</sub> /Pt                     |
| This work    | Yes          | 0.2                | -2, 2       | Yes              | Yes                            | Yes                   | Yes                | Zr                     | Yes             | Ta <sub>2</sub> O <sub>5-x</sub>                   | Pt / Zr /Ta <sub>2</sub> O <sub>5-x</sub> / Pt            |

**Supporting Table 1.** Comparison of different inert top electrode materials on the electrical properties of TaO<sub>x</sub>-based VCM ReRAMs.

| Reference     | On/Off Ratio | Current Level (mA) | Forming Voltage (V) | Voltage (V) | Bipolar Polarity | Cyclic Voltammetry Measurement | Retention & Endurance | XPS data available | Top Electrode Material | ECM-based ReRAM | Tantalum Oxide form                                | The structure of the memory device             |
|---------------|--------------|--------------------|---------------------|-------------|------------------|--------------------------------|-----------------------|--------------------|------------------------|-----------------|----------------------------------------------------|------------------------------------------------|
| <sup>7</sup>  | No           | 100                | 6                   | -3, 3       | Yes              | No                             | No                    | No                 | Cu                     | Yes             | TaO <sub>x</sub> (Ta <sub>2</sub> O <sub>5</sub> ) | Cu/Ta <sub>2</sub> O <sub>5</sub> /Pt          |
| <sup>8</sup>  | No           | compare            | No                  | No          | No               | No                             | No                    | No                 | Cu                     | Yes             | TaO <sub>x</sub>                                   | Cu/TaO <sub>x</sub> /Pt                        |
| <sup>9</sup>  | No           | 1                  | No                  | -1, 1       | Yes              | No                             | No                    | No                 | Ag                     | Yes             | TaO <sub>x</sub>                                   | Ag/ TaO <sub>x</sub> /TiN                      |
| <sup>10</sup> | No           | 3                  | No                  | -.1, .15    | Yes              | No                             | No                    | No                 | Ag                     | Yes             | TaO <sub>x</sub>                                   | Ag/TaO <sub>x</sub> /Pt                        |
| <sup>11</sup> | No           | 1.2n               | Yes                 | -15, 15     | Yes              | No                             | No                    | Yes                | Al                     | Yes             | TaO <sub>x</sub>                                   | Al/TaO <sub>x</sub> /Pt                        |
| This work     | Yes          | 0.2                |                     | -2, 2       | Yes              | Yes                            | Yes                   | Yes                | Zr                     | Yes             | Ta <sub>2</sub> O <sub>5-x</sub>                   | Pt / Zr /Ta <sub>2</sub> O <sub>5-x</sub> / Pt |

**Supporting Table 2.** Comparison of different active top electrode materials on the electrical properties of TaO<sub>x</sub>-based ECM ReRAMs.

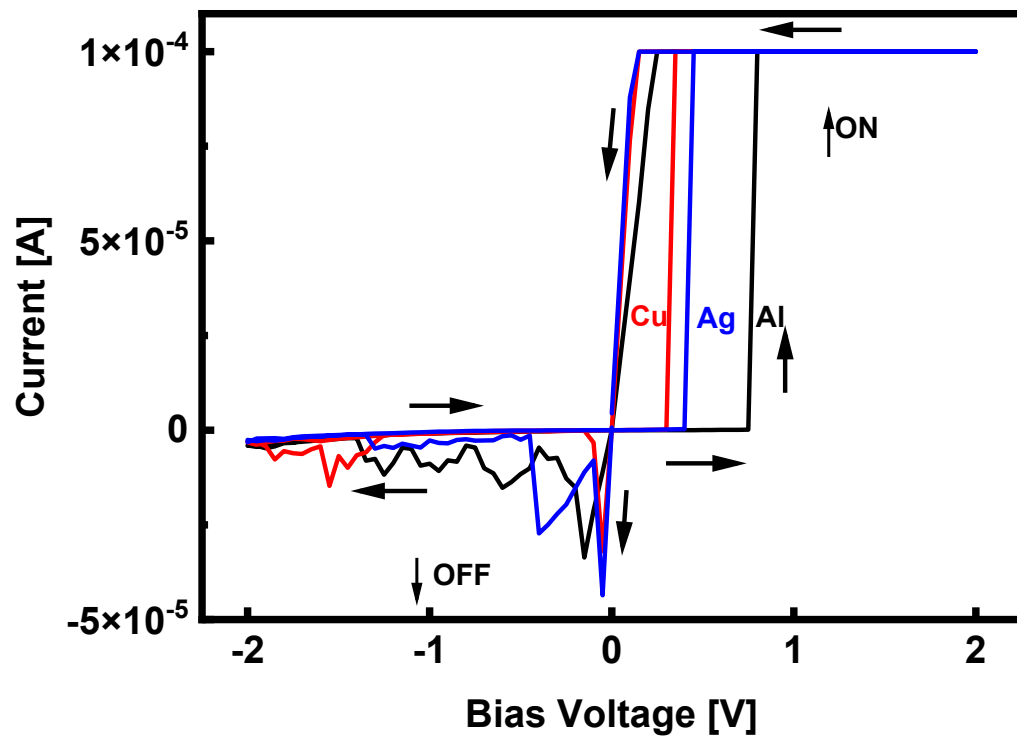

**Supporting Figure S1** |  $I$ - $V$  characteristics of the resistive switching memory device with different top electrodes of Al, Ag, and Cu.

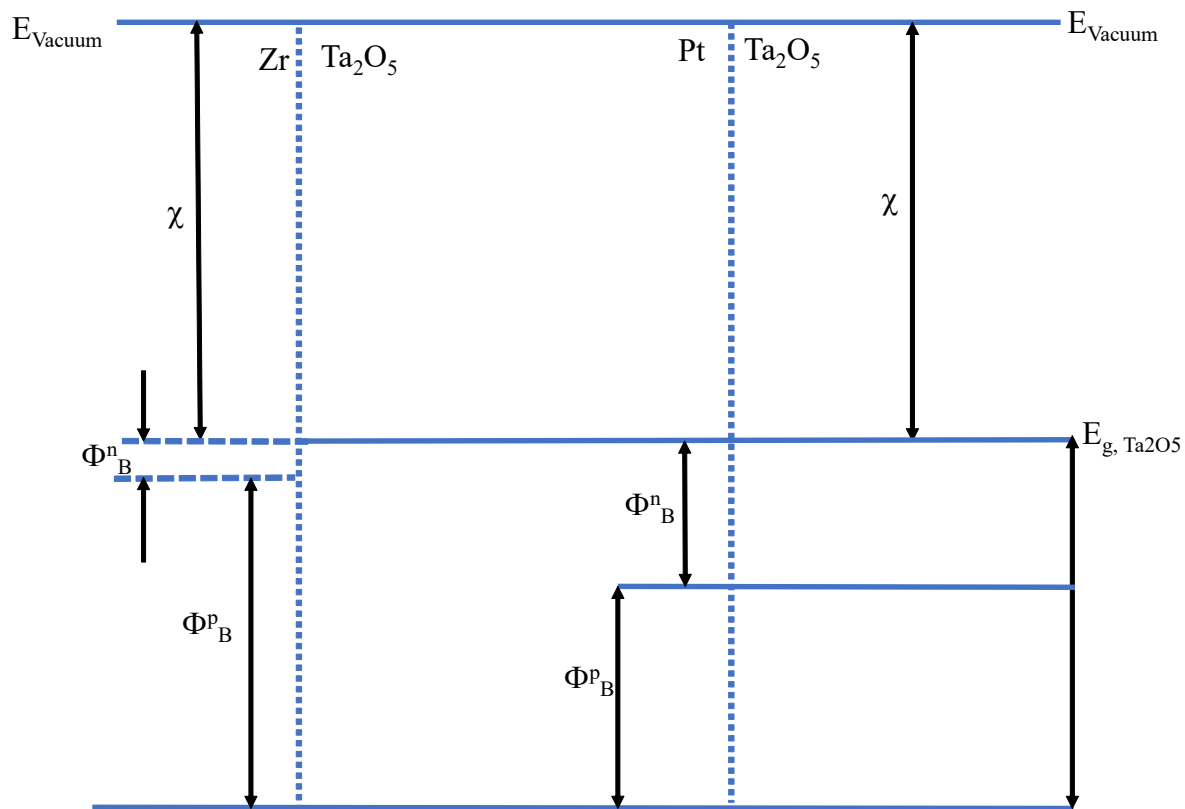

**Supporting Figure S2** | Energy band diagram for Zr and Pt electrodes in contact with Ta<sub>2</sub>O<sub>5</sub> insulator layer.

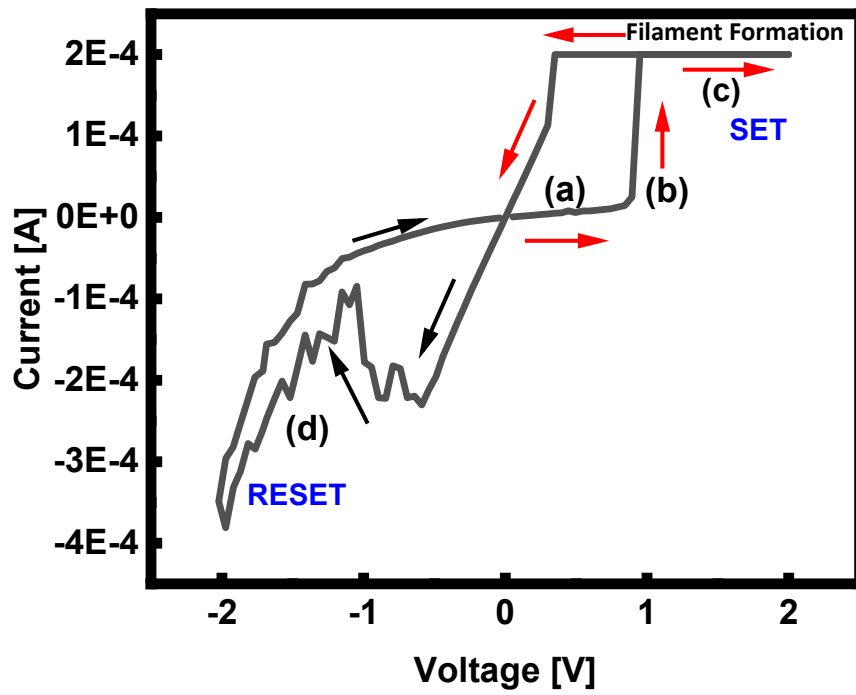

Supporting Figure S3 | linear  $I$ - $V$  characteristics of the resistive switching memory device

## References:

- 1 Rosário, C. M. *et al.* Correlation between the transport mechanisms in conductive filaments inside Ta<sub>2</sub>O<sub>5</sub>-based resistive switching devices and substoichiometric TaO<sub>x</sub> thin films. *Applied physics letters* **112**, 213504 (2018).
- 2 Wedig, A. *et al.* Nanoscale cation motion in TaO<sub>x</sub>, HfO<sub>x</sub> and TiO<sub>x</sub> memristive systems. *Nature nanotechnology* **11**, 67-74 (2016).
- 3 Yang, Y., Sheridan, P. & Lu, W. Complementary resistive switching in tantalum oxide-based resistive memory devices. *Applied Physics Letters* **100**, 203112 (2012).
- 4 Skaja, K. *et al.* Reduction of the forming voltage through tailored oxygen non-stoichiometry in tantalum oxide ReRAM devices. *Scientific reports* **8**, 1-7 (2018).
- 5 Abbas, Y. *et al.* Compliance-free, digital SET and analog RESET synaptic characteristics of sub-tantalum oxide based neuromorphic device. *Scientific reports* **8**, 1-10 (2018).
- 6 Zhu, L., Zhou, J., Guo, Z. & Sun, Z. Synergistic resistive switching mechanism of oxygen vacancies and metal interstitials in Ta<sub>2</sub>O<sub>5</sub>. *The Journal of Physical Chemistry C* **120**, 2456-2463 (2016).
- 7 Tsuruoka, T., Terabe, K., Hasegawa, T. & Aono, M. Forming and switching mechanisms of a cation-migration-based oxide resistive memory. *Nanotechnology* **21**, 425205 (2010).
- 8 Li, Y., Tsurumaki-Fukuchi, A., Arita, M., Morie, T. & Takahashi, Y. in *2019 Silicon Nanoelectronics Workshop (SNW)*. 1-2 (IEEE).
- 9 Pyo, J. & Kim, S. Non-volatile and volatile switching behaviors determined by first reset in Ag/TaO<sub>x</sub>/TiN device for neuromorphic system. *Journal of Alloys and Compounds* **896**, 163075 (2022).
- 10 Huang, X. *et al.* Configurable ultra-low operating voltage resistive switching between bipolar and threshold behaviors for Ag/TaO<sub>x</sub>/Pt structures. *Applied Physics Letters* **113**, 112103 (2018).
- 11 Liu, Q., Xue, Q., Wang, Y., Wei, X. & Hao, J. Bifunctional Device with High-Energy Storage Density and Ultralow Current Analog Resistive Switching. *Advanced Electronic Materials* **7**, 2000902 (2021).
